# Supplementary material for: Maternal obesity may disrupt offspring metabolism by inducing oocyte genome hyper-methylation via increased DNMTs
Source: eLife. 2024 Dec 6;13:RP97507. doi: 10.7554/eLife.97507 (PMC11623932; doi:10.7554/eLife.97507)
Supplement: Figure 2—source data 1. [file elife-97507-fig2-data1.xlsx]

## Sheet: Figure 1A
GTT			CD											HFD						p value
0min	8.7	6.8	7.4	7.7	6.9	7.5			7.3	7.8	6.2	8	9.4	9.7	6.1	6	12.8	13.5	8.4	0.29983
30min	13.2	10	11.4	11	16.6	12.44			24.6	25.9	24.9	26.2	30.1	33.3	24.4	29	31.2	33.3	29.6	3.6023e-08
60min	10.5	7.4	8.2	9.8	8.8	8.94			17.3	17.6	19.9	21.2	18.1	25.9	14.5	20.9	23.9	29.9	22.9	8.61529e-06
90min	10.4	8.5	7.6	8.7	8.5	8.74			10.2	11.4	11.4	11.1	7.9	12.6	5.8	11.5	17.4	14.9	11.1	0.0602432
120min	9.9	7.4	6.3	8.4	5.8	7.56			4.9	7.6	7.8	5.9	5.4	9.7	4	8.2	8.6	10	7.3	0.71443
ITT									13.6	9.2	9.8	10.3	12	10.6	10	10.1	9.2	11.1	6.9	0.0565752
0min	9.8	7.8	8	8	9.2				9.2	5.3	8.9	5	4.9	7.6	3.8	2.8	3.8	6	3.4	0.0247971
30mim	2	1.4	4.6	3.9	2.2				7.7	4.3	9	4.8	3.9	4.9	1.8	2	4.9	4.3	3.2	0.0548652
60min	0.9	0.9	4.6	2.7	2.7				6.9	4.8	10.5	6.6	4.2	7.3	2.6	2.3	4.4	6.3	2.9	0.0146698
90min	0.8	1.8	3.6	2.1	2.3				12.4	4.9	8.3	4.9	4.8	6.2	2.9	2.3	4.4	6.1	5.1	0.0306198
120min	1.9	1.4	4.2	2.9	2.4

## Sheet: Figure 2B
GTT				CF1									HF1											p value
0	5	3.6	4.4	4.6	4.3	5		8.4	8.8	8	7.9	7.5	9.2	4.8	4.3	7.8	5.2	4.2	4.7	5.1	5.1	4.3	5.9	0.0257965
30	13.7	20.4	20.6	16	21.8	17.3		20.4	19.9	14.9	13.4	22.6	20.5	12.9	19.6	17.5	13.4	10.3	17.2	16.6	15.9	16.3	16.3	0.327578
60	8.5	10.4	11	7.5	10.4	8.8		9.9	9.7	9	9	9.6	8.7	8.2	8.8	9.2	10.6	10.8	9.4	10.7	10.8	9.3	11	0.635109
90	6.2	7.2	6.8	7.4	6	7.4		9.4	9.6	7.8	8	6.9	7	7.1	7.8	8	9.9	12.3	8.7	8.5	8.5	8.5	9.2	0.00672997
120	5.1	6.9	5.8	6.2	5.3	5.9		7.7	8.6	7.4	7.3	6.3	6.5	6.5	6.8	9	8.8	9.3	8	7.2	7.9	7.3	7.6	0.000342937
ITT
0	6.2	8.4	7.2	9.7	9.5	9.7		10.4	10	10.2	8.5	9.9	10.4											0.0276611
30	2.8	4.1	4	4.1	4	5.7		5.2	6	4.8	5.7	4.7	4.4											0.0490307
60	3.8	2.2	5.9	3.5	5	6.7		4.2	6.5	4.4	7	4.7	5											0.367097
90	3.1	3.1	9.1	3.4	8.2	9.4		7.9	7.9	4.8	8.5	6.3	11.7											0.286066
120	3.7	3.7	5.6	5	5.7	7.8		8.9	8	5.5	9.5	6.1	9.3											0.0182675

## Sheet: Figure 2C
GTT			CF2								HF2			p value
0	4.8	4.2	5.3	7.5	5.8				6	6.8	8	6	6.5	0.128031
30	16.9	18.5	21.3	20.9	23.3				18.8	16	18.1	11.4	10.8	0.0332198
60	10.9	11.4	15.1	12.7	12.8				10.4	8.3	9.3	9.3	8.5	0.00307407
90	10	8.9	9.4	9	9.8				9.8	7.9	8.2	9.4	6.3	0.131113
120	8.8	8.8	9.2	8.4	9.1				7.9	8.1	8.6	7	7.9	0.0114892
ITT
0	8.2	7.9	8.2	7.5	9.3	9.8	9.3		7.8	7.7	8.3	7.7	8.1	0.122117
30	5.4	4.1	4.6	3.4	4.6	5.2	6.5		5.4	4.6	7	3.5	4.4	0.824218
60	6.5	4	4.2	3.4	4.3	4.7	5.5		7.5	7.6	9.2	4.7	4.2	0.0276603
90	7.7	3.4	3.2	3.8	3.7	5.8	7		10.2	7.7	8.8	5.4	4.4	0.0414769
120	8	4.2	4	4.6	4.3	7.7	7.8		11.3	10.1	8.9	8	5	0.0438196
