# Supplementary material for: Maternal obesity may disrupt offspring metabolism by inducing oocyte genome hyper-methylation via increased DNMTs
Source: eLife. 2024 Dec 6;13:RP97507. doi: 10.7554/eLife.97507 (PMC11623932; doi:10.7554/eLife.97507)
Supplement: Figure 3—source data 1. [file elife-97507-fig3-data1.xls]

## Sheet: Figure 3E–Source Data 
CD	HFD
19.1938	22.8342
17.7567	20.8827
15.9576	20.9765
17.2737	17.0448
17.4102	22.3515
17.8635	21.4247
18.531	22.4612
18.1051	19.6198
17.3718	22.2029
	22.0411

## Sheet: Figure 3F–Source Data 
CD	HFD
23.9726	25.1997
23.9372	25.4178
24.1506	25.1407
23.5517	25.273
24.0486	25.19
23.9248	24.3921
24.1728	24.7794
24.5104	24.8269
24.9795	24.9066
	25.6807

## Sheet: Figure 3G–Source Data 
CD	HFD
22.8383	24.0571
23.0256	24.3266
23.072	24.1332
22.7364	24.1824
23.1695	24.2425
22.9797	23.493
22.9864	24.0133
23.1041	23.7884
23.5211	23.7935
	24.3994

## Sheet: Figure 3H–Source Data 
CD	HFD
655.915	847.394
473.625	612.806
750.616	618.23
897.119	585.524
852.403	979.871
807.024	1065.21
1003.8	862.396
735.044	552.431
786.635

## Sheet: Figure 3I–Source Data 
CD	HFD
151.176	137.218
86.0143	69.8834
84.6513	184.695
127.823	101.174
138.126	102.352
105.82	71.4684
74.558	77.5492
54.0955	69.8834
41.329	154.49
120.873	185.393
87.3599	126.85
109.194

## Sheet: Figure 3J–Source Data 
CD	HFD
37.2628	30.1819
39.3895	51.5318
36.6395	44.5527
32.5883	35.895
37.5742	42.8309
43.9639	41.766
32.5156	42.4762
35.0769	28.1777
47.2741	41.8134
32.4429	37.9092
36.9513	31.9092

## Sheet: Figure 3K–Source Data 
CD	HFD
1183.93	1068.33
1275.94	1110.79
1157.98	1169.77
1292.45	1179.21
1412.77	1143.82
1327.84	1148.54
1455.23	1169.77
1172.13	1273.58
1372.66

## Sheet: Figure 3L–Source Data 
CD	HFD
15.4489	14.5524
16.9811	13.6414
14.7832	13.9238
18.0888	13.8035
14.7816	14.1297
16.652	14.6367
19.8793	13.5308
16.932	14.0069
15.4055	13.9384
	14.013

## Sheet: Figure 3N–Source Data 
CD	HFD	HFD+Melatonin
45.6	33.27	24.42
32.12	50.34	21.48
40.96	31.87	24.86
46.4	59.15	22.64
30.79	35.96	18.07
20.5	44.73	21.01
31.75	59.69	22.81
48.94	42.05	23.54
20.43	45.71	17.78
28.84	62.38	27.01
49.83	34.8	20.2
48.92	45.11	17.8
37.68	34.13	20.05
41.6	49.68	30.99
39.82	33.99	19.02
28.48	34.11	15.56
36.96	33.96	25.48
45.07	17	33.89
51.66	15.48	19.23
29.22	62.6	29.14
43.5	51.97	19.62
46.83	73.43	15.35
42.06	36.04	24.57
38.37	71.13	20.65
44.19	37.46	31.43
52.85	27.95	23.68
44.99	33.86	23.28
37.64	29.91	29.34
36.55	33.09	29.07
32.05	34.65	21.37
20.2	39.01	15.91
23.82	35.7	15.57
17.82	45.83	25.93
25.83	39.19	25.83
33.62	28.86	57.45
18.88	35.21	50.4
49.47	36.41	55.95
50.41	46.95	61.45
69.63	28.47	47.19
61.31	39.26	60.65
52.67	27.17	48.21
83.75	33.11	63.92
43.9	24.56	59.74
41.3	35.82	52.47
60.96	38.18	68.13
51.93	31.34	55.95
60.41	31.36	56.22
64.68	36.12	46.78
68.66	23.85	46.41
44.74	24.97	55.73
44.34	24.39	57.58
57.94	18.94	63.93
51.76	32.86	52.89
45.28	28.64	53.37
53.49	32.08	50.85
68.5	67.45	49.98
46.38	24.06	47.61
73.52	44.27	63.53
47.89	71.87	47.11
66.28	68.92	55.02
58.13	88.67	40.5
34.71	85.19	55.3
40.03	69.91	65.26
79	97.18	73.5
47.16	53.16	74.44
53.15	90.44	45.15
51.68	81.62	54.69
50.98	99.42	39.82
30.82	78.6	38.75
63.45	98.24	38.86
57.75	95.58	30.94
52.26	89.51	44.83
51.08	76.5	55.86
66.35	92.42	41.01
64.72	63.17	47.65
56.82	91.87	40.8
60.58	79.71	43.18
49.4	73.52	52.13
42.72	55.2	51.41
43.58	69.51	47.24
44.44	80.45	60.64
53.77	68.58	54.23
55.57	81.68	39.39
48.6	81.63	42.27
54.41	73.32	58
53.99	91.74	45.93
56.18	69.93	51.79
44.84	65.19	48.03
47.5	76.44	43.49
49.26	77.46	40.39
33.08	72.29	39.23
41.14	71.48	39.21
62.52	74.74	40.03
44.86	59.75	40.47
31.37	65.13	41.18
48.08	86.96	32.21
50.42	90.19
44.34	67.91
47.15	63.6
48.26	78.48
47.74	69.24
44.42	81.28
52.97	78.84
53.91	90.48
38.99
40.75
40
55.82
47.24
