# Supplementary material for: Maternal obesity may disrupt offspring metabolism by inducing oocyte genome hyper-methylation via increased DNMTs
Source: eLife. 2024 Dec 6;13:RP97507. doi: 10.7554/eLife.97507 (PMC11623932; doi:10.7554/eLife.97507)
Supplement: Figure 4—source data 1. [file elife-97507-fig4-data1.xls]

## Sheet: Figure 4C–Source Data 
Control	Luzindole	Melatonin
30.23	67.48	32.91
36.84	55.56	44.93
42.99	77.51	36.73
31.86	69.81	48.81
43.81	60.96	43.23
34.19	58.96	38.92
22.93	57.23	45.02
54.88	59.79	43.72
37.5	58.48	37.08
40.35	47.79	25.5
30.48	47.43	44.29
27.99	30.31	45.34
39.47	50.1	50.36
29.16	39.86	53.51
20.04	56.62	53.77
28.85	54.61	26.89
36.26	47.34	50.31
22.81	59.69	49.15
29.33	48.93	57.36
20.53	34.26	50.08
28.04	53.91	55.45
37.54	60.48	51.38
26.54	40.21	54.42
64.29	43.36	30.43
47.13	45.18	32.64
57.24	40.1	43.34
35.37	50.28	39.88
59.88	30.88	41.54
70.1	54.43	33.55
55.41	50.97	46.07
63.35	60.27	52.92
48.04	41.54	35.53
41.02	23.18	43.85
24.06	29.19	37.99
60.99	37.34	49.76
29.72	39.24	52.4
46.77	36.33	62.66
43.23	22.14	42.98
55.44	59.78	35.97
43.9	55.24	26.85
23.19	33.33	46.1
55.97	36.95	44.64
48.15	44.18	37.6
47.59	29.61	33.06
68.76	50.67	26.33
64.62	19.11	26.78
55.44	41.35	36.72
28.43	36.86	32.34
31.98	42.41	23.37
59.02	39.9	26.23
34.26	39.26	49.81
32.21	43.46	29.73
33.32	55.17	26.01
38.57	26.23	29.41
47.42	44.01	27.15
35.82	36.76	20.96
27.45	48.36	41.94
35.94	48.17	31.9
30.22	39.75	22.08
43.19	54.92	41.61
33.09	61.08	25.22
49.57	43.09	21.76
43.22	51.19	36.99
63.73	47.7	22.65
61.75	62.34	28.05
52.89	49.11	26.5
64.2	65.11	34.5
38.78	46.13	28.06
42.84	59.8	42.23
35.4	41.14	30.23
42.53	54.44	36.69
23.56	58.36	35.53
43.12	54.27	31.94
42.38	67.25	48.62
56.34	39.99	32.54
42.24	64.19	31.12
45.35	58.32	26.81
62.49	69.17	41.74
40.7	62.27	33.01
50.8	61.93	25.57
55.01	55.12	27.97
	65.45	39.48
	60.37	34.51
		33.05
		37.54
		35.78

## Sheet: Figure 4D–Source Data
Control	Luzindole	Melatonin
21.93	20.33	19.3
18.42	37.27	17.31
19.43	33.77	16.85
20.48	34.84	20.2
24.91	19.2	19.38
19.01	35.97	19.11
15.08	43.59	14.82
20.2	39.11	18.66
23.02	40.96	19.09
20.21	20.73	20.36
18.11	33.7	18.5
16.75	25.99	18.27
16.94	26.93	20.56
16.47	25.52	18.16
15.42	21.73	18.35
17.13	20.04	14.34
18.44	24.14	11.57
22.05	25.81	17.16
25.26	13.2	19.64
21.28	15.91	18.71
22.05	28.3	11.76
19.18	22.79	17.67
20.64	31.5	18.41
19.92	15.27	20.86
34.98	25.16	17.84
20.75	25.39	15.54
19.74	26.74	19.07
16.27	14.01	17.88
27.16	20.86	12.2
17.09	23.03	18.68
17.54	19.03	18.7
21.85	23.22	12.82
22.4	12.7	14.19
15.59	14.1	15.01
15.43	15.35	14.5
25.66	17.95	14.32
17.7	17.08	14.65
22.77	11.71	14.77
18.45	27.37	19.89
17.23	22.32	12.45
18.08	18.11	15.44
15.47	22.99	14.17
18.18	15.58	11.52
19.78	17.76	12.46
16.91	21.18	14.04
15.04	16.92	16.42
18.79	15.48	17.18
18.4	21.94	14.79
15.75	17.41	14.77
15	20.51
16.03	22.03
17.62	26.77
15.71	21.75
17.15	37.3
17.36	17.81
17.44	25.91
17.4	30.74
17.19	19.57
17.66
15.52
17.73
16.52
19.03
16.77

## Sheet: Figure 4E–Source Data
		Control						Luzidole			p value			Melatonin		p value
ADCY5	1.17825	1.13575	1.07182	1			1.03397	0.757535	0.943878		0.0372875		1.08621	0.652314	0.739054	0.0369717
ADCY6	0.825845	1	0.909034	1.1408			1.12857	1.48504	2.02881		0.0278434		0.771266	0.547243	0.497428	0.00946053
ADCY9	1.11118	1.14789	0.896593	1			2.02841	1.31645	1.44551	2.27365	0.0177498		1.74775	1.14789	0.896593	0.178221

## Sheet: Figure 4F–Source Data
Control	Luzindole	Melatonin
39.6328	43.651	33.1834
38.8623	39.4786	36.4017
26.6328	68.0558	37.3236
39.0164	66.7047	26.9363
27.2399	63.1741	29.2163
37.7849
53.705
56.6776
