# Supplementary material for: Maternal obesity may disrupt offspring metabolism by inducing oocyte genome hyper-methylation via increased DNMTs
Source: eLife. 2024 Dec 6;13:RP97507. doi: 10.7554/eLife.97507 (PMC11623932; doi:10.7554/eLife.97507)
Supplement: Figure 5—source data 1. [file elife-97507-fig5-data1.xls]

## Sheet: Figure 5B–Source Data 
Control	SQ22536	Forskolin
31.14	31.74	40.94
52.05	36.09	44.29
52.03	35.08	47.45
52.54	57.71	76.22
47.49	43.26	47.54
40.13	53.12	41.27
32.66	35.1	57.61
52.78	50.44	48.44
33.47	60.82	57.63
42.53	31.44	66.29
45.87	35.71	74.11
64.46	67.56	47.76
48.13	33.56	56.85
44.46	25.69	79.58
33.59	59.51	63.16
55.5	44.18	86.21
52.55	46.28	42.8
29.99	33.21	60.8
37.92	46.07	86.61
30.04	46.23	68.26
71.14	43.16	44.15
54.29	33.97	52.63
66.08	44.89	65.97
53.57	43.93	51.28
37.48	39.9	69
41.74	46.34	49.39
44.04	51.01	52.68
52.62	45.87	43.91
41.26	39.48	58.7
50.12	44.43	72
39.41	47.33	77.96
49.29	43.17	52.81
32.47	34.7	74.54
37.89	35.14	61.76
58.49	32.42	61.9
38.5	40.19	69.06
46.8	45.57	56.64
39.45	39.74	96.95
46.39	34.64	77.48
39.8	41.75	97.87
56.85	38.19	48.97
43.43	41.34	64.95
37.29	43.68	77.83
54.16	44.7	59.53
33.89	38.47	72.9
49.73	40.92	66.72
50.02	34.42	66.93
66.86	39.69	84.79
47.73	42.52	107.32
40.66	38.78	74.24
33.48	41	70.45
73.02		76.46
46.94		73.41
52.5		94.17
32.24		73.67
39.03		96.09
59.84		68.74
65.66
62.22
66.86
49.21
69.09
51.58
48.23
38.98
48.21
62.8
52.03
57.72
51.19
47.44
49.84
48.37
43.07
48.11
57.9
31.11
50.57
47.72
51.92
44.7
41.56
52.55
39.29
65.89
51.78
46.83
47.92
41.88
42.26
40.26
37.03
39.58
46.11
60.77
43.86
30.21
63.96
41.27
43.84
50.62
52.47
55.38
54
66.17
43.72
69.8

## Sheet: Figure 5C–Source Data
Control	SQ22536	Forskolin
53.705	38.4004	41.6394
56.6776	46.6001	63.0967
39.6328	38.4004	47.8451
38.8623	37.9387	64.5164
37.7849	39.787	60.3328
39.0164		59.8329
		61
		48.9492
		52.7177

## Sheet: Figure 5E–Source Data
Control	8-Bromo-cAMP
91.16	85.72
87.11	86.37
46.46	119.18
86.08	93.73
121.43	70
92.94	67.07
98.03	128.87
63	47.24
47.13	71.48
58.27	114.59
62.41	73.95
58.4	89.16
61.4	122.37
63.79	58.65
80.7	71.04
96.53	129.94
82.98	93.5
52.55	125.26
70.25	130.89
68.2	116.82
87.13	127.43
117.07	110.07
98.41	107.83
46.89	98.49
61.21	132.73
52.22	67.07
88.53	100.99
83.6	101.4
92.68	126.09
90.81	101.53
99	97.59
95.07	103.31
77.37	80.09
77.31	50.04
109.25	43.96
71.6	78.38
57.49	70.05
77.72	95.53
72.31	68.33
78.3	61.41
62.97	62.6
	94.87

## Sheet: Figure 5G–Source Data
Control	H 89 2HCl
76.32	95.06
104.99	75.61
89.14	79.08
53.83	81.84
82.12	78.92
69.04	86.54
75.41	52.07
84.31	77.73
88.4	74.71
62.63	65.14
113.9	77.5
80.54	53.52
103.96	70.83
84.69	64.85
113.65	62.86
84.85	72.85
51.16	57.82
95.11	51.32
62.58	89.61
89.02	61.19
66.31	58.47
65.32	60.53
78.42	76.36
108.42	98.96
	93.31
