# Supplementary material for: Maternal obesity may disrupt offspring metabolism by inducing oocyte genome hyper-methylation via increased DNMTs
Source: eLife. 2024 Dec 6;13:RP97507. doi: 10.7554/eLife.97507 (PMC11623932; doi:10.7554/eLife.97507)
Supplement: Figure 6—source data 1. [file elife-97507-fig6-data1.xls]

## Sheet: Figure 6A–Source Data 
			control						SQ22536			p value		forskolin				p value
CREB1	1.03417	1.02258	1.07	1	1		0.483649	0.481058	0.922587			0.00535162	1.21377	0.900593	2.01886	1.63908		0.0466716
CREB3l2	0.830972	0.949417	1.33128	1	1		0.717001	0.475634	1.18271	0.601093	0.74411	0.0462087	1.66392	0.984639	0.90142			0.234505
CREM	1.22058	0.998477	0.954084	1	1		0.60132	1.04225	1.04116			0.152128	1.63521	1.58254	1.02213			0.0259672
ATF1	1.10079	0.905594	0.842622	1	1.189		0.447347	1.05605	0.535456	0.898857	1.4553	0.261688	0.867398	1.31924	0.841195	1.74455	1.08373	0.193332

## Sheet: Figure 6C–Source Data
Control	SQ22536	Forskolin
103.69	60.24	80.04
67.41	51.52	82.44
75.96	48	117.51
62.92	57.9	82.16
58.46	53.32	80.34
63.93	40.53	89.45
116.31	62.46	89.38
59.1	60.6	76.75
53.77	54.84	120.02
64.66	57.23	70
81.03	66.82	114.82
62.04	53.49	94.13
46.63	56.73	72.92
60.85	68.53	71.87
50.81	68.66	71.42
69.5	51.03	91.79
73.54	59.15	109.61
73.99	62.88	77.09
70.13	58.9	99.41
67.4	60.51	90.24
72.32	70.37	90.07
59.69	69.73	107.81
52.64	54.78	70.87
60.92	61.81	83.61
69.08	65.06	94.98
48.72	60.7	112.53
46.91	60.4	58.94
63.8	57.09	84.82
64.63	63.12	97.69
42.65	50.51	81.01
65.02	51.47	61.4
69.14	48.58	96.38
60.3	68.29	77.17
73.49	47.25	75.18
40.35	53.11	66.75
53.08	49.9	65.01
	44.63	117.01
	54.44	91.15
	57.7	126.13
	57.77	91.62
	63.44	79.39
	62.79
	51.74
	53.96
	60.13
	52.64
	59.1
	51.65

## Sheet: Figure 6E–Source Data
Control	8-Bromo-cAMP
51.46	63.66
55.99	74.85
26.68	57.94
58.16	32.99
47.57	59.89
73.02	74.01
41.94	56.63
43.32	63.39
58	77.07
52.86	59.22
64.07	62.18
46.78	73.58
63.45	41.56
43.09	71.84
46.2	81
53.29	56.14
66.63	67.95
73.27	77.12
52.02	68.98
47.07	81.37
54.13	66.22
43.36	76.13
76.71	70.25
51.67	77.93
68.35	57.95
74.72	64.23
33.55	94.01
34.73	68.25

## Sheet: Figure 6G–Source Data
Control	H 89 2HCl
49.11	46.2
41.71	44.58
58.21	32.38
41.42	46.94
45.28	40.96
125.31	39.29
39.65	52.76
90.48	59.53
119.55	52.12
41.19	42.51
38.18	38.87
33.17	37.29
41.13	45.25
87.62	40.79
45.42	45.84
38.2	41.73
40.25	43.71
49.8	41.86
39.09	39.06
54.29	40.3
35.87	40.99
37.98	40.45
51.63	35.87
	40.91
	44.9
	45.5
