# Supplementary material for: Maternal obesity may disrupt offspring metabolism by inducing oocyte genome hyper-methylation via increased DNMTs
Source: eLife. 2024 Dec 6;13:RP97507. doi: 10.7554/eLife.97507 (PMC11623932; doi:10.7554/eLife.97507)
Supplement: Figure 7—source data 1. [file elife-97507-fig7-data1.xls]

## Sheet: Figure 7A–Source Data 
			control						SQ22536			p value			forskolin				p value
DNMT1	0.99031	0.959871	0.815191	1.29772	1		1.04956	0.815179	0.63879	0.441786	1.15505	0.242037	1.27213	1.50825	1.209		1.0374		0.0444155
DNMT3a		1.04103	0.822003	0.953821	0.883234		1.18725	1.02399	0.463215	0.780402		0.722039	1.20406	1.04336	1.63463	1.23472			0.0193097
DNMT3l	1.41692	0.855898	0.863675	0.765658	1.0304	1.33708	1.19132	0.925391	0.625451	0.819729		0.58377	0.758266	0.942162	1.21789	0.78598	1.07505	0.747086	0.192519

## Sheet: Figure 7B–Source Data
		control							luzindole				p value			melatonin				p value
DNMT1	1.07182	0.909034	0.946158	1			0.88643	1.12662	0.887611	1.5234			0.451243	0.598831	0.679871	0.474251				0.00172171
DNMT3a	1.03552	1.05135	1.03489	1			1.15625	0.917813	1.43853				0.317711	0.73671	0.654723	0.980698				0.0341217
DNMT3l	0.946158	0.910767	1.1408	1.20229			1.10347	0.907779	0.919391	0.576904	0.737931	0.769947	0.0841096	0.718742	0.735488	0.807246	0.973953	0.637989	1.20607	0.131058

## Sheet: Figure 7D–Source Data
Control	8-Bromo-cAMP
30.45	24.59
31.79	32.44
33.21	27.81
32.28	32.72
33.24	28.01
31	29.24
35.37	22.16
34.67	32.22
31.4	25
30.83	30.9
23.36	29.12
29.49	28.82
32.85	29.55
33.54	25.35
32.8	28.73
35.02	26.85
35.44	28.49
33.51	34.74
29.26	30.61
33.93	41.31
31.1	31.32
33.8	37.23
32.27	42.62
32.97	30.89
26.28	22.75
28.52	22.94
19.87	30.43
18.2	30.5
24.2	31.41
20.28	22.51
21.99	23.73
18.93	24.25
24.41	24.68
21.4	23.08
23.04	22.41
21.54	28.99
29.48	24.47
23.99	21.23
26.32	28.22
19.9	32.73
14.33	34.12
22.27	22.27
26.35	28.17
15.91	29.91
19.95	28.9
29.74	23.79
20.77	27.59
24.76	32.46
22.52	44.39
24.04	29.37
21.13	25.73
23.35	25.65
27.86	35.2
29.79	26.34
	39.09
	38.06
	42.08
	36.29
	39.8
	36.18
	20.78
	38.16
	35.62
	29.79
	31.99
	37.95
	29.78
	33.03
	37.53
	39.09

## Sheet: Figure 7F–Source Data
Control	H 89 2HCl
31.16	31.41
31.57	27.29
40.71	34.43
35.92	29.76
30.56	38.58
35.59	38.05
30.43	20.98
24.71	26.04
28.89	28.74
23.78	32.18
28.98	32.42
24.23	32.4
30.21	28.37
30.43	27.62
33.4	35.08
33.95	32.64
28.27	28.09
29.38	37.69
34.75	31.02
35.5	35.99
31.98	35.34
33.32	37.08
31.7	26.98
30.81	28.89
33.76	31.29
22.19	32.93
32.47	36.85
28.57	26.65
38.27	21.24
32.52	26.12
27.75	28.45
36.13	25.95
39.33	28.33
38.58	25.68
36.61	35.26
45.91	28.44
38.66	28.47
30.13	24.66
30.07	24.11
28.23	30.73
27.24	27.39
36.62	29.54
33.68	27.76
31.19	22.9
32.5	25.68
23.47	26.71
42.29	20.96
30.87	29.41
34.38
33.9
32.63
31.78
40.1
32.34
30.14
28.67
29.85
31.94
37.99
29.6
26.92
31.82

## Sheet: Figure 7H–Source Data
Control	8-Bromo-cAMP
4	6
5	3
3	6
3	6
3	8
4	5
2	2
5	7
3	5
1	5
2	6
5	3
1	5
3	4
2	3
2	5
3	5
1	5
1	3
2	4
2	7
2	7
2	4
4	4
6	5
3	5
3	6
4	6
1	5
6	8
	5

## Sheet: Figure 7J–Source Data
Control	H 89 2HCl
10	7
27	13
9	4
11	4
14	3
14	8
17	4
19	2
2	9
15	5
17	15
19	3
1	10
11	8
16	11
14	1
4	14
1	8
19	6
20	24
11	4
10	2
	2
	4
	12
	14
	2
	16
