# Supplementary material for: Maternal obesity may disrupt offspring metabolism by inducing oocyte genome hyper-methylation via increased DNMTs
Source: eLife. 2024 Dec 6;13:RP97507. doi: 10.7554/eLife.97507 (PMC11623932; doi:10.7554/eLife.97507)
Supplement: Figure 8—source data 1. [file elife-97507-fig8-data1.xls]

## Sheet: Figure 8A–Source Data 
			CD						HFD				p value
DNMT1	1.00053	0.946332	0.99031	0.959871	1.29772		1.73691	1.86183	2.80955	1.52027	1.0543		0.0334636
DNMT3a	1.13315	1.04103	0.953821	1	1		1.27952	2.28126	1.55875	1.79152			0.00758718
DNMT3l	1.12389	0.921918	1.09212	1.0304	1		1.29787	1.149	1.68499	1.74058	1.02525	1.62558	0.0223551

## Sheet: Figure 8B–Source Data
CD	HFD
39.6328	45.3571
38.8623	62.3033
26.6328	59.2958
39.0164
27.2399
37.7849

## Sheet: Figure 8C–Source Data
		CD						HFD			p value
CREB1	0.935707	1	1	1			1.58532	1.89665	1.23104		0.0151541
CREM	1.06381	1.05505	1.08069	1			0.65567	0.534397	0.732847		0.000561323

## Sheet: Figure 8E–Source Data
CD	HFD	HFD+Melatonin
32.99	42.05	41.37
42	73.52	35.29
34.59	45.86	31.88
29.1	57.36	39.72
48.11	56.19	29.67
27.39	73.68	44.97
22.34	65.22	42.51
34.87	70.83	35.52
36.93	60.38	35.58
27.97	37.81	35.15
38.08	52.17	40.59
51.54	62.87	37.32
40.06	54.09	35.06
45.67	65.27	30.94
44.43	52.32	27.71
34.48	81.96	32.8
28.93	49.63	33.66
34.48	62.1	36.27
43.44	37.2	39.54
24.96	80.44	30.22
41.95	62.02	30.31
36.17	53.86	32.35
45.29	44.73	27.57
37.29	36.92	38.17
22.81	42.7	25.79
27.26	48.26	29.09
47.87	45.2	22.13
38.24	43.3	31.53
32.58	56.2	38.7
34.49	41.92	42.12
32.03	55.55	29.28
35.53	40.72	33.14
38.79	36.57	28.9
34.58	35.18	21.14
38.81	41.06	22.9
38.76	42.49	16.38
35.6	52.78	28.25
32.88	41.38	30.63
32.36	35.62	23.57
36.3	43.13	28.19
28.71	53.22	30.93
25.56	45.96	24.01
26.62	42.1	27.63
28.69	38.69	32.36
38.26	47.9	26.16
34.14	44.07	31.2
37.42	78.55	29.23
39.87	51.97	37.12
40.99	42.95	26.34
27.33		26.21
28.4		29.3
35.24		31.6
23.75		30.31
31.77		30.74
45.99		39.44
28.22		35.04
30.52		24.23
38.69		25.8
28.09		23.33
32.02		25.07
33.34		18.1
32.96
33.3
31.4
46.43
33.47
26.1
36.28
29.69

## Sheet: Figure 8G–Source Data
CD	HFD	HFD + H 89 2HCl
32.93	43.77	103.24
36.29	75.91	61.27
70.22	77.33	68.42
52.18	52.76	95.76
43.58	60.88	71.27
32.32	94.15	60.06
33.41	56.84	70.06
38.85	90.39	59.15
54.47	81.14	61.55
59.75	83.14	83.3
36.45	63.49	74.27
32.2	105.6	82.9
46.34	97.66	55.28
53.68	56.97	66.87
42.92	94.28	63.55
60.1	62.05	45.52
45.21	63.76	61.44
53.14	62.75	73.59
40.07	97.94	72.96
43.52	84.55	73.82
53.93	87.36	68.92
48.24	91.51	40.5
62.58	71.97	38.08
59.55	77.27	48.96
35.58	75.02	35.05
43.05	84.59	38.84
36.28	90.71	51.3
46.06	89.43
42.3	81.92
57.24	69.33
26.62	61.57
44.72
45.19
44.01
77.18
49.41
33.1
50.35
62.66
24
52.77
49.64
60.7
65.74
47.75
74.92
76.94
50.46

## Sheet: Figure 8I–Source Data
CD	HFD	HFD + H 89 2HCl
78.86	64.15	97.6
78.46	59.23	60.99
60.17	71.2	66.52
69.09	71.86	66.75
70.49	110.15	78.88
62.08	125.06	68.05
64.38	84.54	82.15
79.6	68.21	66.39
75.63	66.52	70.54
53.34	71.94	52.8
65.73	81.82	59.48
66.83	70.95	59.81
63.26	115.89	93.92
61	91.54	62.03
65.51	116.59	60.75
36.04	60.99	62.05
84.84	100.64	68.67
		68.5
		89.58
		92.66
		73.3
		73.47

## Sheet: Figure 8K–Source Data
CD	HFD	HFD + H 89 2HCl
5	9	20
7	10	23
5	8	10
5	6	3
5	21	4
5	22	17
9	25	24
2	18	2
3	7	7
1	6	5
6	7	5
8	11	6
5	27	16
6	5	22
2	17	3
11	8	18
15	9	6
6	9	11
6	27	10
19	35	5
9	24	6
2	24	3
8	10	6
8	37	6
	17	12
	25
	24
	33
	17
